# Supplementary material for: A synergistic Cs2CO3ETL treatment to incorporate Cs cation into perovskite solar cellsviatwo-step scalable fabrication
Source: Royal Society of Chemistry journal article supplement (doi:10.1039/d0tc05877g), 2021-01-01
Supplement: d0tc05877g1.pdf [file d0tc05877g1.pdf]

### Electronic Supporting Information

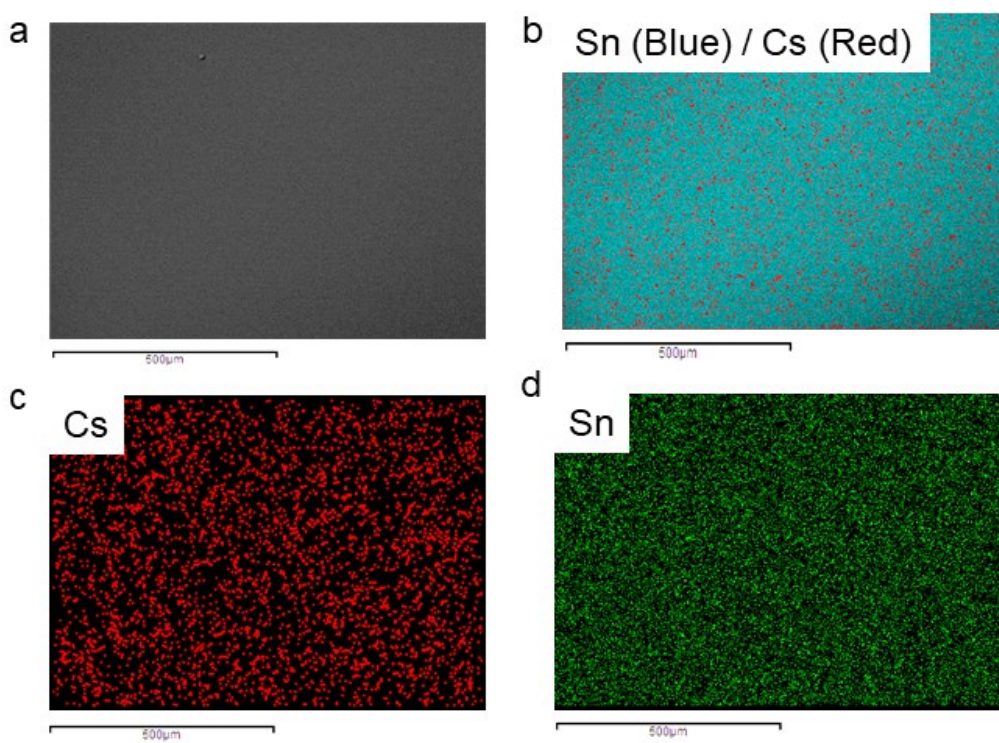

**Figure S1.** The surface of SnO<sub>2</sub>/CC a) SEM image b) EDX overlay of Cs (Red) and Sn (Blue) on SEM image, c) EDX mapping of Cs, d) EDX mapping of Sn

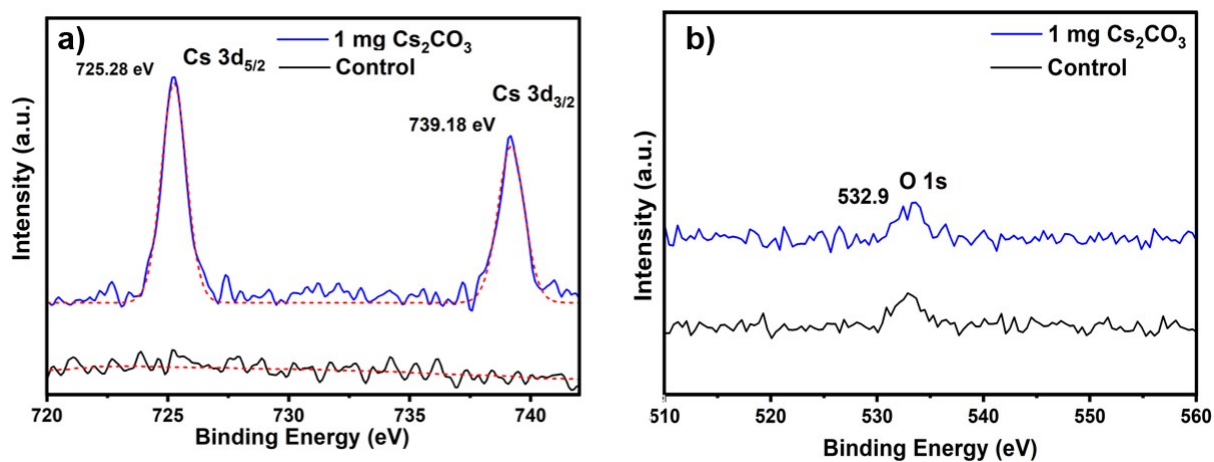

Figure S2. X-ray Photoelectron Spectroscopy (XPS) data of the (a) Cs 3d orbital and (b) O 1s orbital.

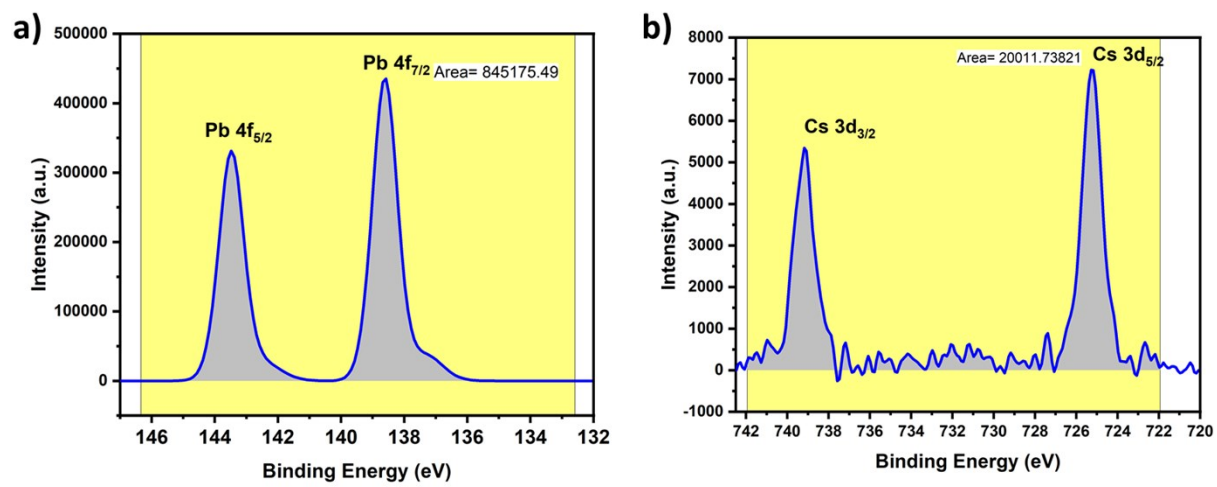

Figure S3. Integrated X-ray Photoelectron Spectroscopy (XPS) peaks of the a) Pb4f and b) Cs3d orbitals.

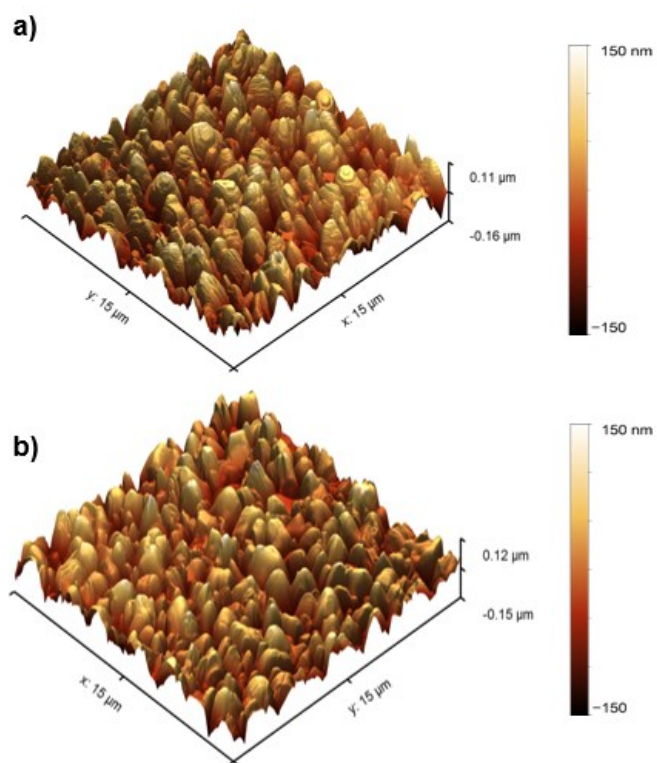

**Figure S4.** Three-dimensional atomic force microscopy (AFM) images of (a)  $\text{SnO}_2$ , and (b)  $\text{SnO}_2/\text{CC}$  deposited on ITO

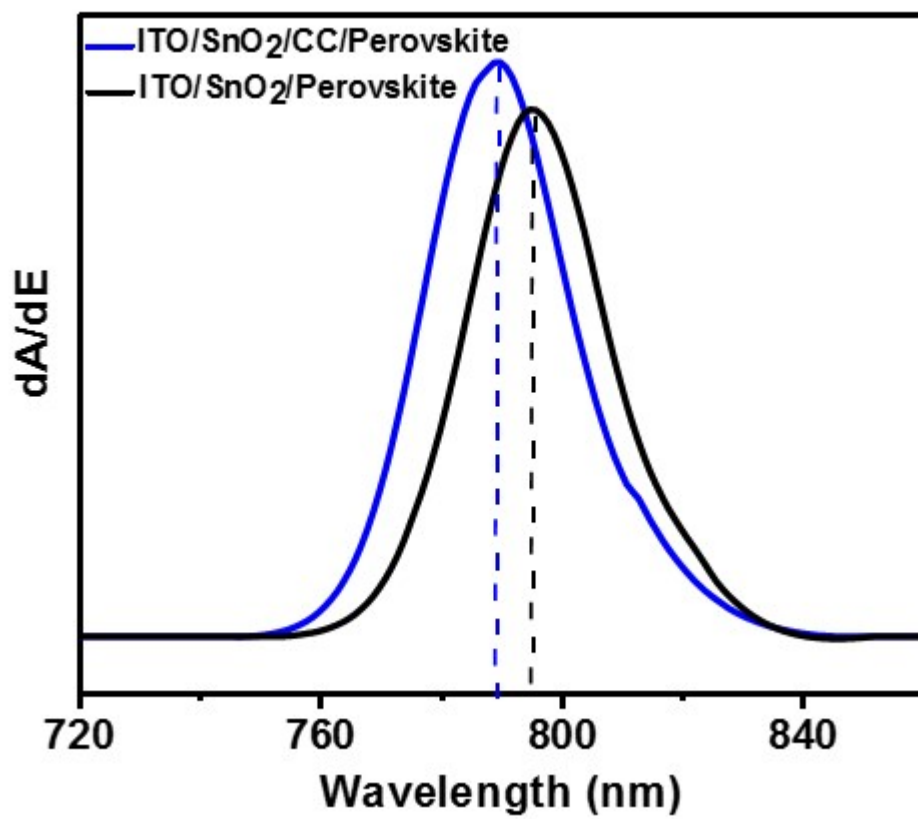

**Figure S5.** Plot of the background flattened differential of the absorption onset in films prepared with and without a CC interlayer.

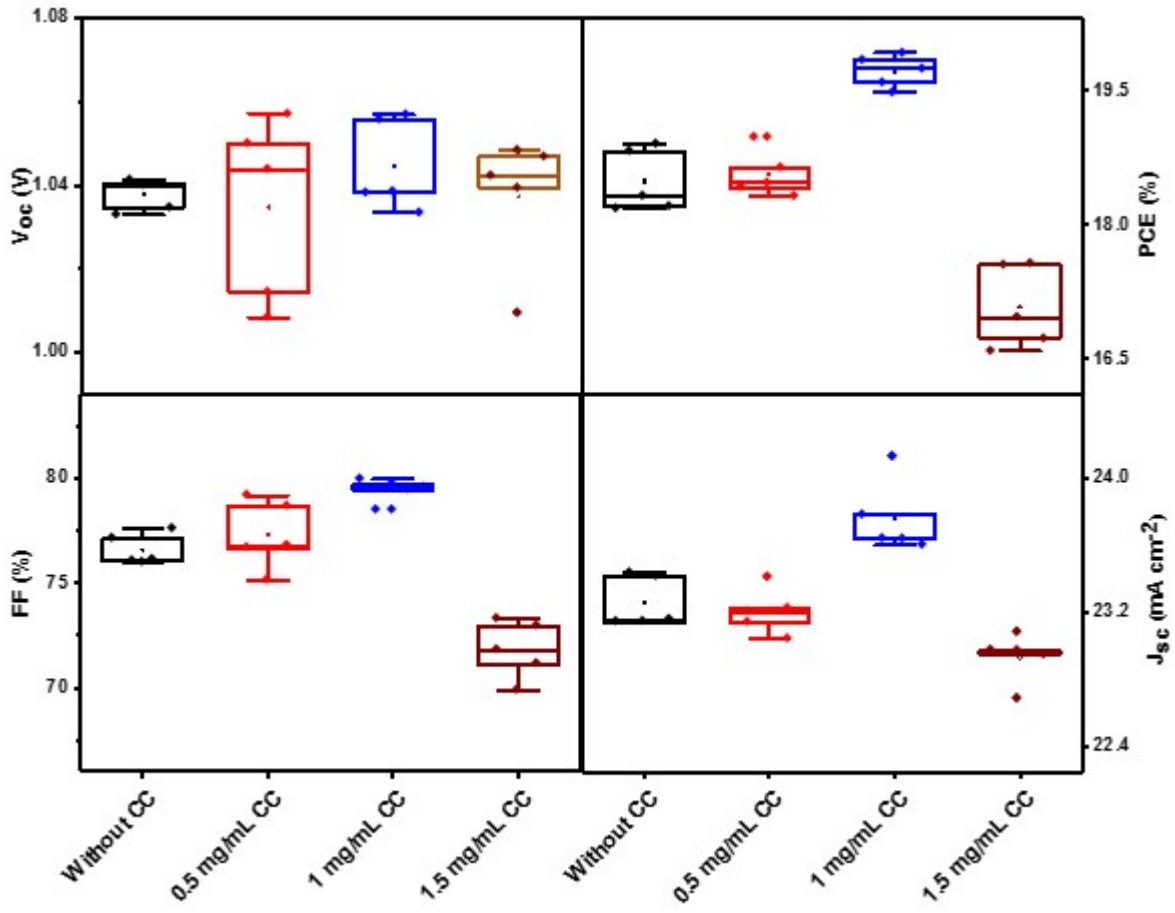

Figure S6. Photovoltaic parameters (PCE,  $V_{oc}$ , FF, and  $J_{sc}$ ) of solar cells at various concentrations of CC.

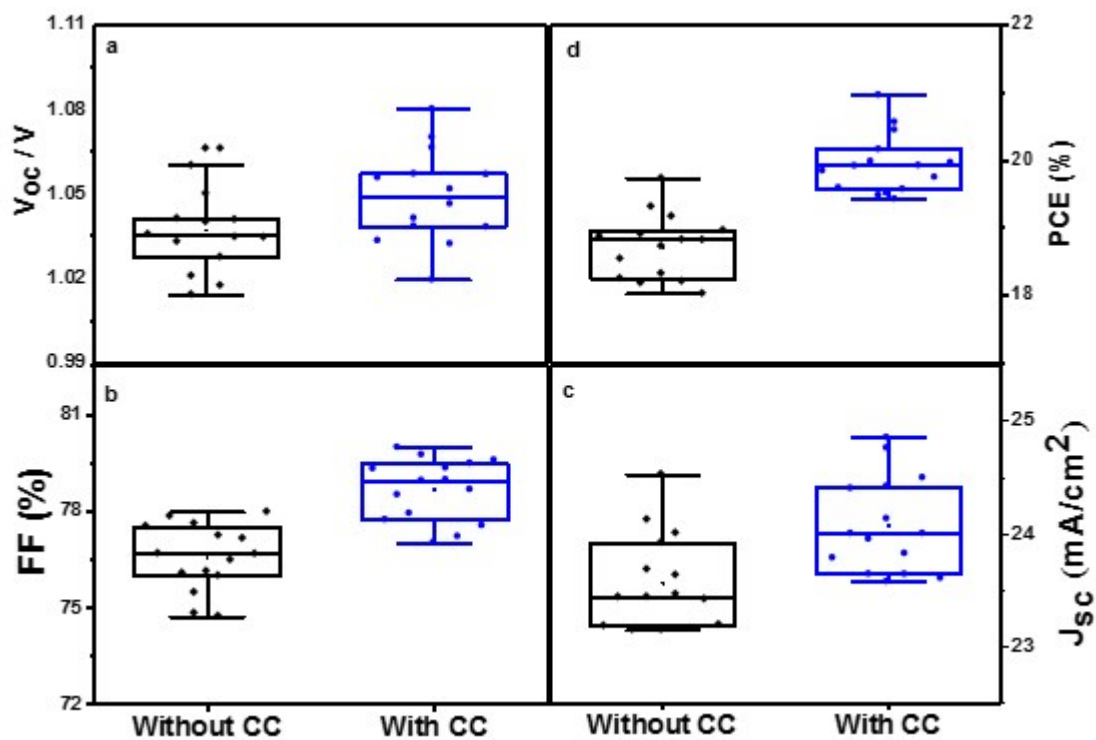

**Figure S7.** a)  $V_{oc}$ , b) FF, c)  $J_{sc}$ , and d) PCE statistics of 15 devices with different ETLs measured with a scan rate of  $20 \text{ mV s}^{-1}$  without preconditioning, such as light soaking or long-term forward voltage biasing.

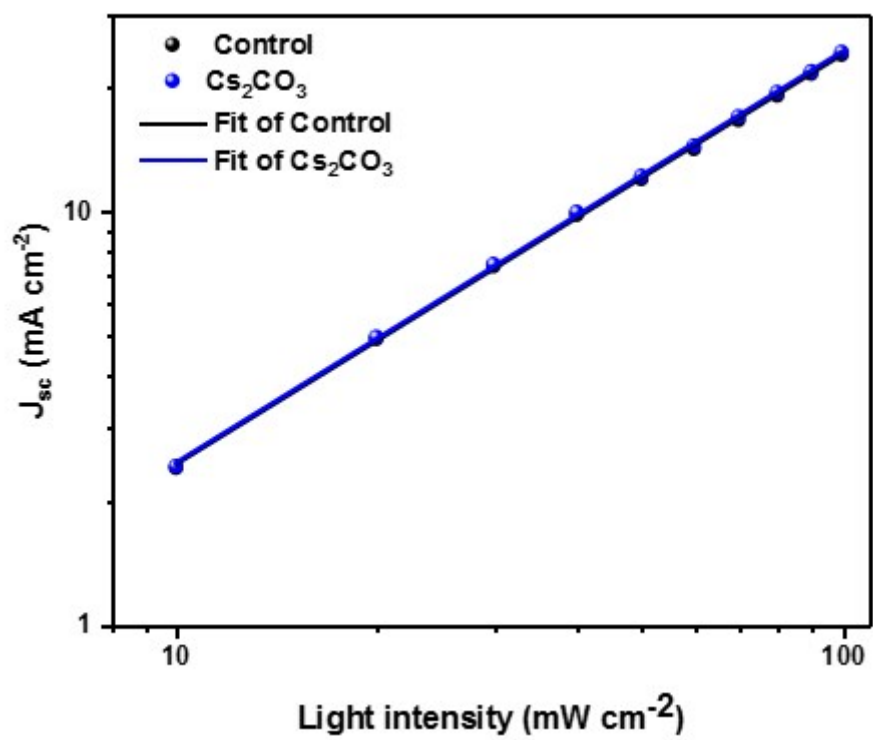

Figure S8. Light intensity-dependent  $J_{sc}$



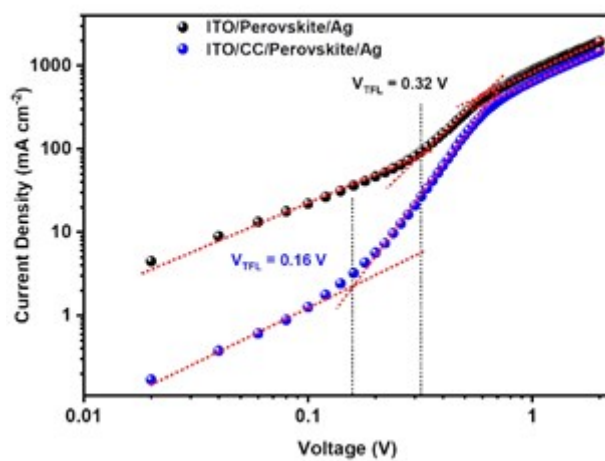

Figure S9. Current density–voltage characteristics of devices with the configuration of ITO/(without and with CC) /perovskite/Ag

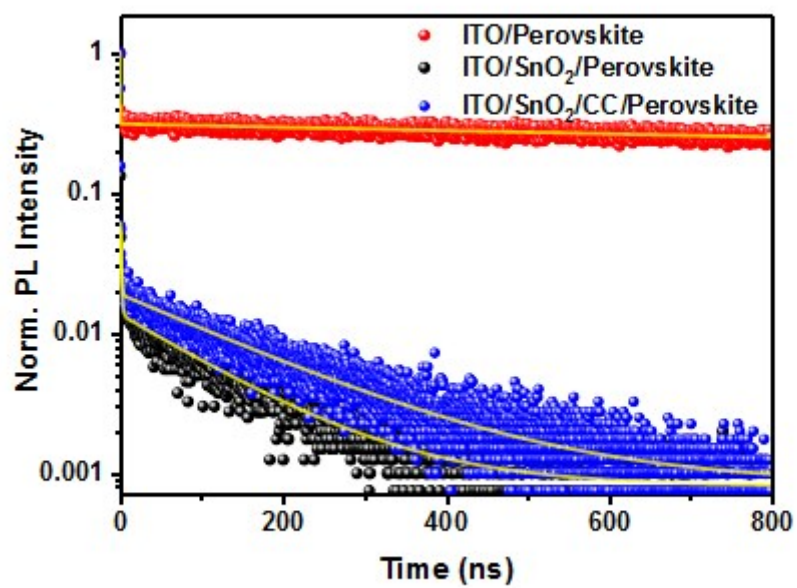

Figure S10. Time correlated single photon counting of perovskite films deposited on different ETLs.
